# Supplementary material for: Antithrombin deficiency is associated with mortality and impaired organ function in septic pediatric patients: a retrospective study
Source: PeerJ. 2018 Sep 5;6:e5538. doi: 10.7717/peerj.5538 (PMC6129139; doi:10.7717/peerj.5538)
Supplement: File S2 — Data set of antithrombin in septic children [file peerj-06-5538-s002.xlsx]

## Sheet: Antithrombin Sepsis Children
Age	Gender	Underlying Disease	Survivor	PIM2 at ICU admission	PIM2 at CRP-peak	CRP d-3	CRP d-2	CRP d-1	CRP d0	CRP d1	CRP d2	CRP d3	ATIII d-3	ATIII d-2	ATIII d-1	ATIII d0	ATIII d1	ATIII d2	ATIII d3	Diagnosed Thromboembolic Event	Diagnosed Bleeding Event	Daignosed Organ Dysfunction - CNS	Diagnosed Organ Dysfunction - Cardiovascular	Diagnosed Organ Dysfunction - Lung	Diagnosed Organ Dysfunction - Liver	Diagnosed Organ Dysfunction - Kidney	Diagnosed Organ Dysfunction - Inestinal Tract	Diagnosed Organ Dysfunction - Other
[months]	[female=1/male=0]		[yes=1/no=0]	[predicted death rate]	[predicted death rate]	[mg/dl]	[mg/dl]	[mg/dl]	[mg/dl]	[mg/dl]	[mg/dl]	[mg/dl]	[mg/dl]	[mg/dl]	[%]	[%]	[%]	[%]	[%]	[yes=1/no=0]	[yes=1/no=0]	[yes=1/no=0]	[yes=1/no=0]	[yes=1/no=0]	[yes=1/no=0]	[yes=1/no=0]	[yes=1/no=0]	[yes=1/no=0]
0	0	Extreme immaturity, gestational age less than 28 completed weeks	1	0.085	0.085				12.52	12.04	8.54					36				0	0	0	1	1	0	0	0	0
0.0655738	1	Former premature, current lung failure	1	0.049	0.064		0.05		4.7		1.41					34				0	0	0	0	0	0	0	0	0
0.0666667	0	Multiple organ failure, hypervolemic shock due to sepsis	0	0.316	0.96			2.24	2.55					41	45	33				0	0	0	0	0	0	0	0	1
0.233333	1	Cystic fibrosis, low birth weight newborn	1		0.044	8.09	8.11	7.94	9.83	6.02		1.99	27		31	26	30			0	0	0	0	1	0	0	1	0
0.333333	1	Birth weight of 999 grams	0	0.151	0.291		0	2.8	15.6					44		25				0	1	0	1	1	0	0	1	0
0.333333	0	Asphyxia at birth	1	0.123	0.077			8.05	20.65	11.73		4.21	40			50				0	0	0	1	0	0	0	0	0
0.366667	0	Transposition of the great arteries	1		0.014	0.75	1.83	2.43	8.15	6.38	2.41	1.66	54	62		51				0	0	0	0	0	0	0	0	0
0.4	0	Respiratory distress syndrome	0	0.076	0.031	0.12	4.28		26.86	14.7		4.34	43			31				0	0	0	0	1	0	0	0	0
0.566667	1	Fallot tetralogy, ventricular septal defect with pulmonary stenosis or atresia, aortic dextroposition, and right ventricular hypertrophy	0		0.137	2.02	13.95	27.56	33.75	24.29	18.42	9.29	37	60	43	40	59	41	48	1	0	0	1	1	0	0	0	0
0.7	1	Gastroschisis	1	0.057	0.01		1.4	2.21	15.4						47	45				0	0	0	0	0	0	0	1	0
0.766667	0	Malignant neoplasm of the kidney	1		0.077				12.97	6.43	3.2	1.8		64	40	41				0	0	0	0	1	0	1	0	0
0.8	0	Hydrocephalus communicans, dilated cardiomyopathy, low birthweight newborn	0		0.301		0.43	24.02	34.7	33.25						51	41			0	0	1	1	1	0	0	0	0
1.03333	1	Pneumococcal meningitis	0	0.239	0.718			8.34	15.25						48	41				0	0	1	1	0	0	0	0	0
1.16667	0	Hypertrophic nonobstructive cardiomyopathy, anoxic brain injury, other low birth weight newborn, acute respiratory failure	1	0.448	0.291		0.94	10.5	30.38	10.2	3.54	2.98		38	118	55	33	39	70	0	0	0	1	1	0	1	0	0
1.16667	0	Gastroschisis	1	0.154	0.051	3.4	6.16	9.82	14.09	9.34		6.74	35			31				0	0	0	0	0	0	0	0	0
1.2	1	Gastroschisis, Sepsis	1	0.162	0.101	18.74			21.85	10.53	4.58	4.58				42	54	49	55	0	0	0	0	0	0	0	0	0
1.3	0	Malabsorption after surgery, physical retardation due to malnutrition	1		0.003		1.79	26.4	30.84	16.69	7.09	7.22				48	60	79	81	0	0	0	0	0	0	0	1	0
1.43333	1	Heart failure	1	0.4	0.564		5.06	22.6	30.03	26.2		6.36	68	61	41	83			55	0	0	0	1	0	0	0	0	0
1.53333	0	Gastroschisis	1		0.004		1.14	2.27	9.97	5.7		2.23			98	53				0	0	0	0	0	0	1	0	0
1.56667	1	Bronchopneumonia; Twin premature baby	1	0.032	0.028			15.68	23.75	15.53	5.36	2.98			61	68	71	67		0	0	0	1	1	0	0	0	0
1.83333	0	Coarctation	1	0.038	0.026		0	1.8	6.6	4.2		2		81	75	60	125	69	70	0	0	0	1	0	0	0	0	0
1.9	0	Diarrhea and gastroenteritis	1	0.01	0.01		10.43		13.23	6.17	0.83	1.42				47				0	0	0	0	0	0	1	0	0
2	1	Cystic fibrosis	1	0.016	0.016				1.52		0.59					57				0	0	0	0	0	0	0	1	0
2.33333	0	Hirschsprung's Disease, Aganglionosis, Megacolon congenitum (aganglionic)	1	0.028	0.01	0.06	3.04	11.25	13.28	7.96	3.85	2.26			58	57	50			0	0	0	0	0	0	0	0	0
2.4	1	Acute meningococcal sepsis, liver fibrosis	1	0.016	0.016			1.66	4.6			0.45				66				0	0	0	0	0	1	0	0	0
3.4	0	RSV bronchiolitis	1	0.008	0.008		1	1.25	2.03		0.32					88				0	0	0	0	0	0	0	0	0
3.43333	1	ASD I, small VSD	1	0.008	0.016				3.41	2.56	1.84	0.99				58	83	84	70	1	0	0	1	1	0	0	0	0
3.76667	0	Sepsis	1	0.009	0.009				14.58			1.37				67	75			0	0	0	0	0	0	0	0	0
3.86667	0	Rota and adenovirus enteritis	1	0.013	0.013		1.89	8.19	8.55	7.41		1.54		58		42				0	0	0	0	0	0	0	0	0
4.03333	1	Atresia of the bile ducts, liver fibrosis, Z.n. Liver TX	1	0.011	0.004			8.9	20.68	7.22	3.69	2.38				47		62	63	1	0	0	1	0	1	0	0	0
4.2	1	Down syndrome, atrial and ventricular septal defect, common atrioventricular canal, endocardial defect, ostium-primum defect (ASD I)	1	0.023	0.009	1.8		4.42	14.96	9.8	4.08	2.82	70		57	47	57			0	0	0	1	1	0	0	0	0
4.36667	1	Transposition of the great vessels	1		0.008	0.51		4.86	6.94	2.07	0.89	0.37	47			34	37	50	52	1	0	0	1	1	0	1	0	0
4.63333	0	Meningococcal sepsis	1	0.099	0.073		15.67	31.31	34.31	24.59	12.76	4.64		42	58	82	73	71	68	0	0	0	1	1	0	0	0	0
5.8	0	Waterhouse-Friderichsen syndrome, hemorrhagic inflammation and adrenal gland due to meningococcal sepsis, adrenal haemorrhage	1	0.182	0.052		19.3	24.56	36.62	34.82	20.88	10.15		93	120	72	85	82	81	0	0	0	0	1	0	1	0	0
6.1	0	Congenital aplastic anemia, Blackfan Diamond anemia, familial hypoplastic anemia, Fanconi anemia	1	0.241	0.157	18.26	20.38	26.34	28.54	27.72	22.25	11.07	63	64	64	45	52			0	0	0	0	0	0	0	0	0
6.46667	1	Short Bowel Syndrome	1	0.009	0.009		18.3	33.39	45.04	36.93	21.77	14.19		48	42	42	61	62		0	0	0	0	0	0	0	1	0
6.8	0	Newborn with extremely low birth weight	1		0.006			3.3	20.21	8.98		3.36				26		67		1	0	0	1	1	0	0	1	0
7.27869	1	Burn IIa-IIb 30% of the body surface, bronchopneumonia	1	0.063	0.058	0.05	3.83	14	15.93	13.88	13.94	10.72	53	33	39	46	52	95	71	0	0	0	0	0	0	0	0	0
8.1	0	Acute meningococcal sepsis	1	0.008	0.008				28.06	26.27	4.54					68	68		116	0	0	0	0	0	0	0	0	0
8.76667	0	RSV positive, otitis media	1	0.008	0.008				4.38			1.44				125				0	0	0	0	0	0	0	0	0
9.36667	1	Short bowel syndrome, currently enterococcal sepsis, anemia in questionable occult intestinal bleeding	1	0.013	0.013				16.69	9.74						58	57			0	1	0	0	0	0	0	1	0
9.83333	1	Short bowel syndrome, enterococcal sepsis	1	0.01	0.01				26.12	14.82						54				0	0	0	0	0	1	0	1	0
12.0333	0	Acute infection of the lower respiratory tract, otitis media	1	0.011	0.011				5.81	4.97						113	113			0	0	0	0	0	0	0	0	0
12.1	1	Short bowel syndrome, enterococcal sepsis, bleeding	0	0.186	0.186			6.17	2.44						49	15				0	1	0	0	0	1	0	1	0
12.1967	1	Influenza	0		0.045	0.24	0.83	1.59	1.67	0.98		1.07	100	78	92	105	79	78	90	0	0	0	1	0	0	0	0	0
12.2	0	Hereditary fructose intolerance, short-bowel syndrome according to volvulus	1	0.028	0.028	8.11	27.14	27.45	30.44	25.76	14.51	6.29		30	50	55	71	50	62	0	0	0	0	0	0	0	1	0
12.5333	0	Hypoxic encephalopathy	1	0.008	0.01			1.07	1.62			0.22				95				0	0	1	0	0	0	0	0	0
13.7667	0	Meningococcal sepsis	1	0.012	0.012			1.11	1.12		0				125	125				0	0	0	0	0	0	0	0	0
14.8333	0	Hirschsprung's disease, aganglionosis	1	0.023	0.023		8.09	21.71	41.23	41.46					67	68				0	0	0	0	0	0	0	1	0
14.9333	0	Heart failure	0	0.041	0.36	2.8	3.37	19.58	23.35	12.72	6.86	4.25		86	64	65	73	71	70	0	0	0	1	0	0	1	0	0
15.0333	0	Meningococcal meningitis, meningococcal sepsis	1	0.022	0.022			24.52	25.81	12.68					79	64	79			0	0	0	0	0	0	0	0	0
15.0667	0	Craniosynostoses, acrocephaly	1	0.026	0.004	2.71	6.46	21.78	23.8	16.74	14.19	16.9	100	109	98	98	94	102	81	0	0	0	0	0	0	0	0	0
17.9	0	Tonsillopharyngitis, upper respiratory tract infection	1	0.013	0.013				6.67	3.73		1.28			90	84				0	0	0	0	0	0	0	0	0
19.1667	1	Malabsorption, acute meningococcal sepsis	0	0.033	0.028	43.58	44.85	42.78	53.52				37	46	46	66	22			0	0	0	0	0	0	0	0	0
19.3443	1	AML [Acute myeloid leukemia]	1		0.044	30.39	31.4	34.37	34.48	32.12	23.71	10.13		42	50	48		51	49	0	0	0	0	0	0	0	0	0
19.5	1	Gastroesophageal reflux disease with reflux oesophagitis	1	0.027	0.021				14	13.97	8.36	5.41				50	55	65	66	0	0	0	0	0	0	0	1	0
19.8333	1	Bronchitis, Urticaria with joint involvement	1	0.008	0.008				3.28	3.03						82				0	0	0	0	0	0	0	0	0
19.9333	0	Sepsis	1	0.011	0.011			6.5	7.79		5.41	2.54				73				0	0	0	0	0	0	0	0	0
20.5246	1	Methylmalonicenemia	1	0.047	0.032	1.04	1.53	18.28	24.74	19.89	10.06	6.61			37	27	37	41	56	0	0	0	0	0	0	0	0	0
21.0164	0	Polycystic kidney, kidney transplant	0	0.048	0.039	2.55	2.56	2.83	4.42	3.45						73				0	0	0	0	1	0	1	1	0
23.8	0	Spinal muscular atrophy, non-infectious gastroenteritis and colitis, thrombocytopenia	0	0.416	0.23	3.68	3.15	24.8	39.51	29.79	16.45	7.93		51	59	62	54	39	43	0	0	0	0	1	0	0	1	1
24.8	1	Acute meningococcal sepsis	0	0.062	0.062				2.15							32	74			0	0	0	1	1	0	1	0	0
26.4	1	Acute myeloid leukemia	1	0.068	0.055		19.41	24.71	29.01	28.51	23.4	19.3			61	57	46	81	87	0	0	0	0	0	0	0	0	0
26.5	0	Meningococcal sepsis	1	0.011	0.013		1.6	15.07	45.77	44.81	31.15	9.28			101	115	81	73		0	0	0	0	0	0	0	0	0
27.4667	1	Acute myeloid leukemia, Down syndrome trisomy 21	1	0.062	0.055	0.7	0.7	5.26	6.87	3.67	2	1.76				83				0	0	0	0	0	0	0	0	0
28	1	Sepsis	1	0.011	0.011			5.38	17.87							96				0	0	0	0	0	0	0	0	0
29.7333	1	Sepsis due to Staphylococcus aureus	1	0.015	0.015				18.28	9.35						111	92			0	0	0	0	0	0	0	0	0
31.1667	1	Gastroschisis	1	0.012	0.012			4.66	23.39	19.46	9.4	7.07			55	41	40	51	56	0	0	0	0	0	0	0	1	0
31.2459	1	Acute lymphoblastic leukemia	1	0.05	0.04	13	2.33	9.7	14.05	11.22	4.94			125		125				0	0	0	0	0	0	0	0	0
31.6667	1	Pneumonia, epilepsy, Dandy-Walker syndrome of unknown origin, severe developmental delay, sepsis with multiple organ failure	0	0.833	0.833				17.51	10.45	9.56					62	54	57		0	0	0	1	1	1	0	0	0
33.377	1	Septic shock	1	0.009	0.009				8.93	8.49						73	90			0	0	0	0	0	0	0	0	0
33.9333	1	Acute bronchitis	1	0.002	0.002				8.93	8.49						73	90			0	0	0	0	1	0	0	0	0
34.1667	1	Broviac catheter sepsis, vancomycin tolerability, post-rota- and adenovirus pos. gastroenteritis	1	0.008	0.008	11		22.22	22.68	21.21		13.41				59	68		79	0	0	0	0	0	0	0	0	0
34.3667	0	Other disorders of the metabolism of branched amino acids	1	0.01	0.01				44.44		31.53	15.18				65				0	0	0	0	0	0	0	0	0
34.8333	1	Sepsis	1	0.012	0.012	0.15	0.24	9.32	11.29	7.76						65				0	0	0	0	0	0	0	0	0
35	1	Pneumococcal sepsis, pneumonia, renal failure, cardiomyopathy	1	0.21	0.21			24.5	32.97	22.5	12.38	6.38				75	68	92	99	0	0	0	1	1	0	1	0	0
36	1	Nephroblastoma IV	1	0.083	0.059	2.92	18.62	34.42	48.45	26.91	11.42	6.48	37	56	46	59	58	73	71	1	0	0	0	0	0	0	0	0
37.541	1	Pharyngotonsillitis herpetic stomatitis, pharyngitis caused by herpesviruses	1	0.01	0.009				24.21							90				0	0	0	0	0	0	0	0	0
37.6	1	Meningococcal sepsis, meningitis	1	0.023	0.02			26.64	38.89	18.8	5.55				51	45	68	74	96	0	0	0	0	0	0	0	0	0
39.9	1	Multiple congenital malformation, deaf-muteness	1	0.009	0.009				33.26		11.68					51		41		0	0	0	0	0	0	0	0	0
41.7333	0	Atresia of the bile ducts	1	0.01	0.004	5.4	11.59	28.75	30.4	27.54	23.95	18.16	75	80	84	58	49	55	42	0	0	0	0	0	1	0	0	0
41.8667	0	Meningococcal sepsis	1	0.019	0.018			12.31	18.07	11.74	4.84				94	81	85	112		0	0	0	0	0	0	0	0	0
42.0328	0	Kidney dysplasia, fibrocystic kidney	0	0.194	0.844		0	0.2	1.51					78	61	45				0	0	0	0	1	1	1	0	0
42.3333	0	Meningococcal sepsis	1	0.014	0.013		7.41	19.15	29.09	16.52	6	4.26		85	62	66	87	98		0	0	0	0	0	0	0	0	0
45.5	1	Sepsis lenta	1	0.008	0.008				33.31	27.61	15.3					76	59			0	0	0	0	0	0	0	0	0
47.4	0	Acute meningococcal sepsis	1	0.145	0.094		4.65	26.1	30.8	19.8	11.56	4.84		64	81	125	104	115		0	0	0	0	0	0	1	0	0
48.0328	0	Toxic megacolon, multicystic dysplastic kidney on the right	0	0.194	0.844			0.2	1.51					78	61	45				0	0	0	0	0	0	0	0	0
49.6333	1	Respiratory insufficiency	1	0.241	0.3	1.68	1.42	1.41	4.01	4	2.57	1.81	79	88	80	74	79	87	96	0	0	0	1	1	0	1	0	0
50.0667	1	Sepsis	1	0.01	0.01				14.36	5.79						91				0	0	0	0	0	0	0	0	0
50.2667	0	Global developmental disorder, Zn aspiration pneumonia	1	0.085	0.085				9.59	6.35	2.95	1.49				49	78	68	69	0	1	0	0	0	0	0	0	0
52.1667	0	Liver disease	1		0.039		7.32	10.91	21.64		9.55		62			46		55		0	0	0	0	0	1	0	0	0
53.7	0	Gripal infect	1	0.03	0.011		8.48	26.31	27.3	18.59	8.04			70	56	61	78			0	0	0	0	0	0	0	0	0
54.8333	0	Malignant neoplasm - connective tissue and other soft tissues	1	0.039	0.039			17.01	23.89	22.25	23.21	22.02			61	42	118	89	90	0	0	0	1	1	0	1	1	0
56.5333	1	Multi visceral transplantation	1	0.134	0.134	12.28	24.02	33.12	41.31	25.97	13.69	7.3	76	81	62	64	63	67	76	0	0	0	0	0	0	0	0	0
58.3667	0	Hemophagocytic syndrome, E. coli sepsis	0	0.066	0.973	5.31	4.21	7.51	10.38				52	39	35	47				0	0	0	0	0	1	0	1	0
58.7	0	Waterhouse-Friderichsen syndrome	1	0.055	0.641		9.91	19.93	22.16	9.79	6.9	4.66	59	73	78	77	68	71	76	0	0	0	0	1	0	1	0	0
64.6557	0	Lymphoblastic leukemia	1	0.059	0.059			3.21	13.77	13.34	12.48	12.82				94				0	0	0	0	0	0	1	0	0
69.7667	1	Transplantation (rejection), Short bowel syndrome	0	0.279	0.19				40.43	10.42	3.91	2.38			110	58	33	77	65	0	0	0	0	0	1	1	1	0
69.9667	1	Meningococcal meningitis, meningococcal sepsis	1	0.008	0.008			39.41	40.17						89	85				0	0	0	0	0	0	0	0	0
72.459	0	Hirschsprung, ileus symptoms	0	0.048	0.071	10.32	13.29	23.97	25.88	24.47		26.41	82		55	67	49	65	52	0	0	0	1	1	0	1	1	0
73.4333	1	Meningococcal sepsis	1	0.011	0.011			16.7	36	22.78		2.85			79	72	91			0	0	0	0	0	0	0	0	0
75.7667	0	Acute lymphoblastic leukemia	1	0.039	0.039				18.7	15.48	10.87	5.1				80				0	0	0	0	0	0	0	0	0
76.7667	0	Kidney TX after chron. Renal insufficiency, hemolytic anemia	1	0.126	0.052		35.28	34.16	40.51	31.53	15.59	6.65			49	40	66	67		0	0	0	1	0	0	1	0	0
79.2	1	Acute meningococcal sepsis, kidney failure	0	0.152	0.107		5.51	31.26	33.03	31.32	20.05	14.27		34	68	103	79	71	86	0	0	0	1	1	0	1	0	0
81.9667	0	Thrombosis	0	0.013	0.44	1.87	10.14	47.22	55.13	47.94			85	68	106	83	111			0	0	1	1	0	1	1	0	0
82	0	Lymphoblastic leukemia	1	0.139	0.053			23.28	28.34	20.35	7.78	3.65			76	65	58			0	0	1	1	0	0	0	0	0
88.6	1	Status epilepticus, ventricular fibrillation, pleural effusion, hepatopathy	1	0.032	0.053	0.1	0.22	8.55	14.99	9.77	7.35	8.5			115	106				0	0	0	1	0	0	0	0	0
91.3333	0	Malignant neoplasm-cerebellum	0	0.058	0.109	9.34	16.43	29.2	39.7	18.22	10.1	10.8	61	74	65	58	79	63	66	0	0	1	0	0	0	0	0	0
93.5667	1	Acute appendicitis with peritonitis	1	0.033	0.025	10.9		5.68	20.3	8.51	6.33	4.53			71	76	72	82		0	0	0	0	0	0	0	1	0
93.5667	1	Acute appendicitis with diffuse peritonitis, rupture	1	0.033	0.025	10.9		10.57	20.3	8.51	6.33	4.53			67	76	78	82		0	0	0	0	0	0	0	0	0
93.6667	1	Osteoblastic osteosarcoma grade IV right humerus, atopic dermatitis,	1	0.068	0.957	6.44	7.29	15.35	18.8	16.08	10.79	6.25	80	47	38	32	44	36	63	0	0	0	0	0	0	0	0	0
94.4667	0	Intracranial injury	1	0.007	0.003				5.42	4.99	2.64		84			83				0	0	0	0	0	0	0	0	0
96.0333	1	Meningococcal sepsis, meningitis, adrenal hemorrhage	1	0.022	0.015				19.56	11.86	5.98	3.16			53	97	88	103	105	0	0	0	0	0	0	1	0	0
100.197	0	Acute lymphatic leukemia, fever in aplasia	1	0.06	0.082	22.05	23.93	24.32	27.67	24.26	18.38	9.66	33	38	33	35		33	42	0	0	0	0	0	0	0	0	0
104.689	0	Acute lymphatic leukemia, staphylococcal sepsis	1		0.041	0.48		4.27	11.32	5.99	3.23	1.31	50		47	31	47	72	62	0	0	0	0	0	0	0	0	0
111.133	1	Meningococcal sepsis	1	0.074	0.036				28.55	17.47		3.41			83	85	95		114	0	0	0	1	1	0	0	0	0
112.4	0	Pneumococcal sepsis	1	0.009	0.009				26.43	25.27	22.87	9.87				78	73		112	0	0	0	0	1	0	0	0	0
113.8	1	Aspiration pneumonia	1	0.215	0.176	3.58	7.77	24.79	27.54	21.38	11.3	7.75	71	52	51	56	77	89	83	0	0	1	0	0	0	0	0	0
114.1	0	Bacterial meningitis	1	0.013	0.01				9.33	6	1.48	5.25				88	99	104		0	0	0	0	0	0	0	0	0
120.885	0	Follicular [nodular] non-Hodgkin's lymphoma - small cell	1	0.046	0.046	0		6.18	10.06	4.92	2.02	1.05	125			99				0	0	0	0	0	0	0	0	0
123	1	Wilson's disease	1		0.008	1.02	1.47	8.2	15.51	13.51	7.57	4.41	80	74	72	56	71	72	80	0	0	0	0	0	1	1	0	0
125.733	0	Meningococcal sepsis	1	0.008	0.008				18.41	10.8	2.34					80		78		0	0	0	0	0	0	0	0	0
134.533	1	Malignant neoplasm - bone and articular cartilage	1	0.055	0.051		20.75	21.8	26.8	20.46	10.59	8.82			55	60	70	74	72	0	0	0	0	0	0	0	0	0
134.82	1	Influenza (H1N1)	0	0.831	0.679	22.46	22.83	28.98	30.08	17.51	10.06	5.73	61	67	39	50	32	48	31	0	0	1	1	1	0	1	0	0
137.167	0	Endocarditis, pneumonia	1	0.034	0.005	1.11	0.71	5.04	11.15	8.69	4.85			59	70	75				0	0	0	1	0	0	0	0	0
142.167	0	Acute meningococcal sepsis	1	0.008	0.008				0.72	0.7						106				0	0	0	0	0	0	0	0	0
143.267	0	Acute lymphoblastic leukemia	1	0.074	0.039	13.68	33.09	31.66	33.52	33.11	31.65	29.85	47	68	48	41	58	56	34	0	0	0	0	1	1	0	0	0
145.2	0	Meningococcal sepsis	1	0.011	0.01			1.07	3.9	1.48	0.55				95	90	101			0	0	0	0	0	0	0	0	0
146.667	1	Acute meningococcal sepsis	1	0.008	0.008				25.21	15.75	7.68					72	110	100		0	0	0	0	0	0	0	0	0
151.167	0	Meningococcal heart disease, Acute meningococcal sepsis	1	0.045	0.045				18.88	9.67		1.95				80			114	0	0	0	0	1	0	0	0	0
154.7	0	Osteomyelitis, pneumonia, sepsis by Staphylococcus aureus	1	0.011	0.011				17.79	15.09	9.2	9.38				54	55	66	66	0	0	0	0	0	0	0	0	0
155	0	Steven-Johnson syndrome	1	0.008	0.028	4.33	6.76	18.97	25.76	21.4	20.24	18				84	68			0	0	0	0	0	0	0	0	0
161.067	0	Scoliosis after cerebral palsy, epilepsy	1	0.01	0.01		8.92		28.43	19.4	20.31	12.03	63	96	87	83			93	0	0	0	0	1	0	0	0	0
163.9	1	Acute lymphocytic leukemia	0	0.05	0.039	26.55	19.55	16.99	31.9	24.25	7.95	3.83		101	97	104		101		0	0	0	0	0	0	0	0	0
166.1	0	Postinfectious encephalitis, immunodeficiency	1	0.055	0.042			21.03	22.28	21.56	11.94	16.63			63	60	69	57	63	0	0	0	0	1	0	1	0	0
168.267	1	Meningococcal meningitis, meningococcal sepsis	1	0.011	0.011			12.78	28.03	25.34	10.85				87	69				0	0	0	0	0	0	0	0	0
169.933	0	Meningococcal sepsis	1	0.389	0.038				28.21	17.5	4.5	2.3			115	94	73	74	69	0	0	0	0	1	0	1	0	0
171.3	1	Biliary cirrhosis with liver failure	0	0.052	0.067	5.53	4.47	9.54	15.12	8.52	7.62	6.79	47	55	37	43	48	54	46	0	1	0	0	1	1	1	1	0
179.77	1	Acute lymphocytic leukemia, meningitis	0	0.044	0.122	10.35	11.53	12.21	12.86				21	19	19	19				0	0	0	0	0	0	0	0	0
180.8	0	Lymphoblastic leukemia	0	0.219	0.405	7.74	7.66	19.95	20				49	21	28	59				0	0	1	1	1	1	0	0	0
182.667	1	Subdural empyema, sphenoid sinusitis	1	0.007	0.007				21.81	14.62	6.55	2.03			88	64	82	101		0	0	0	0	0	0	0	0	0
182.984	0	Truncus arteriosus communis	1	0.008	0.006				31.31	27.23	20.23					76	71	73	92	0	0	0	0	0	0	1	0	0
184.533	0	Kidney transplantation, cardiomyopathy	1	0.051	0.051			2.02	8.08	6	3.19	1.6			104	81				0	0	0	0	0	0	1	0	0
184.533	0	Renal insufficiency, sepsis by Staphylococcus aureus	1	0.051	0.051			2.02	8.08	6	3.19	1.6			104	81				0	0	0	0	0	0	1	0	0
184.633	1	Acute meningococcal sepsis	1	0.072	0.057				39.26	19.57	8.7	4.19				56			80	0	0	0	0	1	0	0	0	0
185.2	0	Asphyxia under birth, state after kidney transplant	1	0.068	0.039	8.94	8.18	9.4	23.06	17	8.7	4.6			58	52	69	74	73	0	0	0	0	0	0	1	0	0
185.633	0	Acute myocarditis	1	0.224	0.137	9.79	11.02	29.58	57.42	51.93	29.34	11.57	117	84	99	104	107	115	120	0	2	0	1	0	0	1	0	0
186.167	0	Acute myeloid leukemia with pneumonia	1	0.039	0.039	20.86	26.14	28.64	32.24	27.17	18.61	16.65		53	57	55		61	56	0	0	0	0	0	0	0	0	0
187.1	0	Waterhouse-Friderichsen syndrome, hemorrhagic inflammation and adrenal gland due to meningococci, meningococcal sepsis, adrenal haemorrhage	1	0.012	0.012			16.23	23.66	16.54	7.2	3.05			63	63	102	90	93	0	0	0	0	0	0	1	0	0
194.933	1	Meningococcal infection, meningococcal meningitis, acute meningococcal sepsis	1	0.019	0.018			40.11	43.23	9.1					78	81				0	0	0	0	0	0	0	0	0
195.333	0	Pulmonary embolism, pneumothorax, leg vein thrombosis	1	0.101	0.063				4.83	4.09	1.32	0.78				38	51	53	86	1	0	0	0	1	0	0	0	0
197.667	0	Acute lymphoblastic leukemia	0	0.377	0.377				9.51	6.22						22	25			0	0	0	0	0	0	0	0	0
200.067	0	Lymphoblastic leukemia	0	0.224	0.169	19.53	23.09	27.06	41.54	40.93	38.77	27.16	83	71	74	72	59	59	67	0	0	0	0	1	0	0	0	0
201.7	0	Sepsis in state of Pilonidal Sinus Extirpation, Tonsilitis Acuta, Substituted Hypothyroidism	1	0.008	0.008				24.09	18.98		5.51				70	65		88	0	0	0	0	0	0	0	0	0
202.59	1	Acute lymphatic leukemia, fever in aplasia	0		0.134	16.68	15.82	15.36	16.15	15.96	17.18		44	45	47	42	55	36		0	0	0	0	0	0	0	0	0
202.7	0	Traumatic brain edema	1	0.035	0.187	7.05	8.5	10.66	14.73	14.58	11.53	10.37	93	91	84	71	70	79	83	1	0	1	0	0	0	0	0	0
207.467	0	Acute meningococcal sepsis	1	0.044	0.045		14.17	32.86	34.88	23.66	16.03	8.01		41		50	60	67	67	0	0	0	1	1	1	1	0	0
208.367	0	Subacute lymphocytic leukemia	0	0.903	0.796	14.54	21.92	26.06	30.87	28.35			49	59	64	60	43			0	2	1	1	1	0	0	0	0
208.754	1	Malignant neoplasm - bone and articular cartilage, rotavirus positive gastroenteritis, MSRA	1	0.039	0.014		6.6	28.97	30.66	15.22				68	66	73				0	0	0	0	0	0	0	0	0
210.233	0	Bronchitis, sinusitis, diabetes mellitus type II, labile hypertension, greatly increased ACTH	1	0.184	0.175			15.91	19.64	11.63	6.36	4.1			91	97	97	103	125	1	0	0	0	0	0	0	0	0
210.233	0	Bacterial meningitis, granulomatous acanthoma, meningoencephalitis, anterior pituitary insufficiency, ventriculitis, pneumonia	1	0.184	0.175			18.04	19.64	11.63	6.36	4.1			91	97	97	103	120	0	0	0	0	1	0	0	0	0
210.933	1	Sepsis	1	0.009	0.015		6.32	16.06	31.61	24.81						77	85	98		0	0	0	0	0	0	0	0	0
215.7	0	Lymphoblastic leukemia	1	0.039	0.042			12.33	15.8	6.99	3.29	1.52		71	59	63		81		0	0	1	0	0	0	0	0	0
215.733	0	Lymphoblastic leukemia, acute lymphoblastic leukemia	1	0.072	0.058			17.06	29.12	13.26	5.94	3.71			23	24	65			0	0	0	1	0	0	0	0	0
