# Supplementary material for: Antithrombin deficiency is associated with mortality and impaired organ function in septic pediatric patients: a retrospective study
Source: PubMed Central journal article supplement (PMC6129139; doi:10.7717/peerj.5538), 2018-09-05

**A** $\geq 1$  year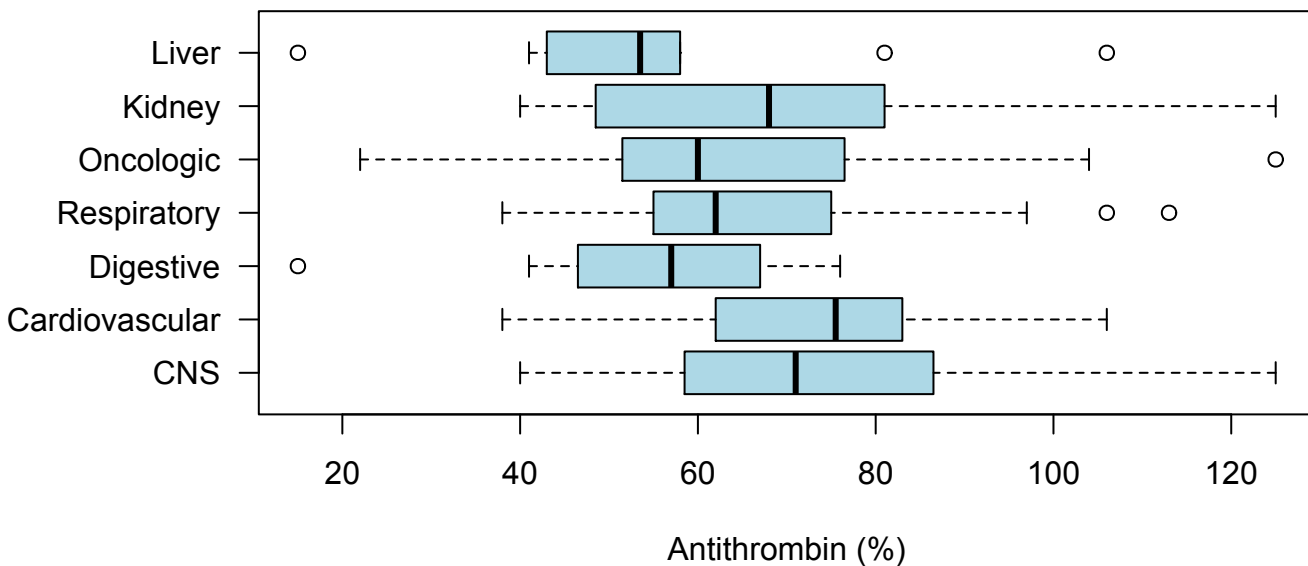**B** $< 1$  year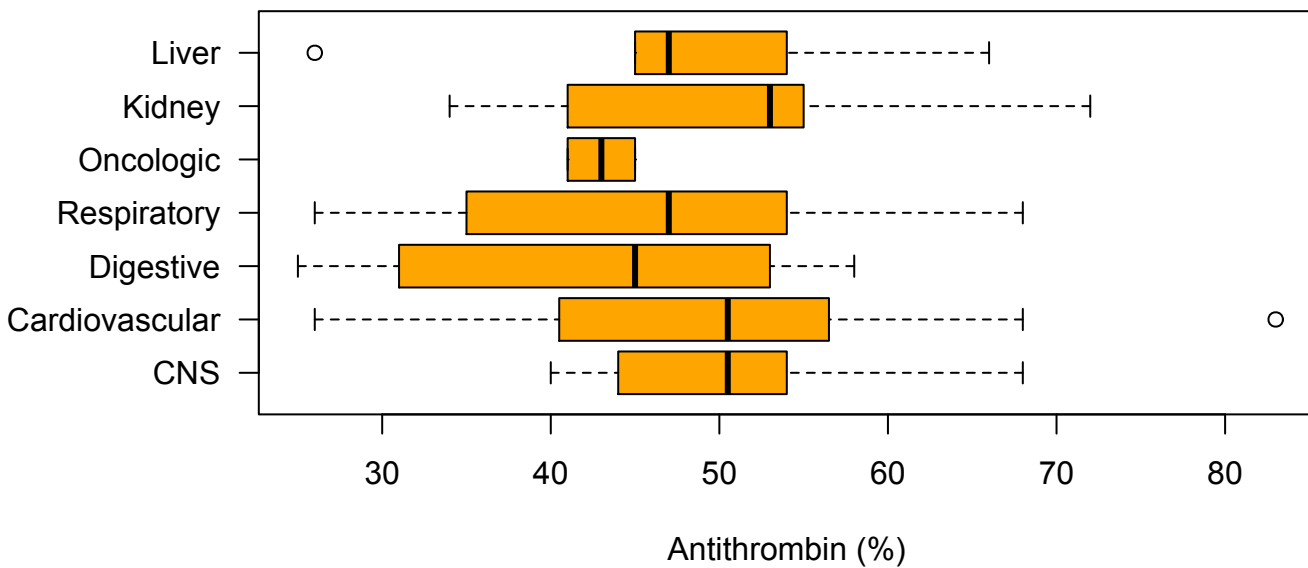

Supplement: peerj-06-5538-s001.pdf [file peerj-06-5538-s001.pdf]
